# Supplementary material for: Discovery and characterization of small-molecule inhibitors of NLRP3 and NLRC4 inflammasomes
Source: PubMed Central journal article supplement — J Biol Chem. 2021 Mar 26;296:100597. doi: 10.1016/j.jbc.2021.100597 (PMC8095128; doi:10.1016/j.jbc.2021.100597), 2021-03-26
Supplement: mmc1.pdf [file mmc1.pdf]

# **Discovery and characterization of small molecule inhibitors of NLRP3 and NLRC4 inflammasomes**

Maria Sebastian-Valverde<sup>1</sup>, Henry Wu<sup>1</sup>, Md Al Rahim<sup>1</sup>, Roberto Sanchez<sup>2,3</sup>, Kunal Kumar<sup>2,3</sup>, Robert J. De Vita<sup>2,3</sup>, Giulio Maria Pasinetti<sup>1,4\*</sup>

<sup>1</sup>Department of Neurology, Icahn School of Medicine at Mount Sinai, New York, New York 10029

<sup>2</sup>Drug Discovery Institute, Icahn School of Medicine at Mount Sinai, New York, NY 10029, USA

<sup>3</sup>Department of Pharmacological Sciences, Icahn School of Medicine at Mount Sinai, New York, NY 10029, USA

<sup>4</sup>James J. Peters Veterans Affairs Medical Center, Bronx, New York, USA

\*To whom correspondence should be addressed:

Giulio Maria Pasinetti, M.D., Ph.D.

Department of Neurology

The Mount Sinai School of Medicine

1 Gustave L. Levy Place, Box 1137

New York, NY 10029

Email: [giulio.pasinetti@mssm.edu](mailto:giulio.pasinetti@mssm.edu)

**Table S1.** Primers for quantitative PCR analysis.

| <b>Gene</b>   | <b>Forward sequence (5'→3')</b> | <b>Reverse sequence (5'→3')</b> |
|---------------|---------------------------------|---------------------------------|
| HPRT          | CCCCAAAATGGTTAAGGTTGC           | AACAAAGTCTGGCCTGTATCC           |
| NLRP3         | GCCATCATCAGCTCCTGTGT            | ACTGGCTGACTGAACGACTG            |
| Caspase-1     | ACTGCTATGGACAAGGCACG            | GCAAGACGTGTACGAGTGGT            |
| IL-1 $\beta$  | CTCCATGAGCTTTGTACAAGG           | TGCTGATGTACCAGTTGGGG            |
| TNF- $\alpha$ | ATGAGCACAGAAAGCATGA             | AGTAGACAGAAGAGCGTGGT            |
| NLRC4         | CAGGTCACAGAAGAAGACCTGA          | ACTTCCCTTTGCCAGACTCG            |
| IL-6          | GAAAAGAGTTGTGCAATGGC            | TATGGTACTCCAGAAGACCA            |

**Table S2.** IL-1 $\beta$  percentage, referred to controls average, released during the first screening by human macrophages in presence of 100  $\mu$ M of the hits from the virtual screening. NLRP3 activation was induced through treatment with 400 ng/ml during 3 hours, followed by addition of 4.5 mM ATP for 45 minutes. All the experiments were conducted by triplicate.

| %IL-1 $\beta$ release (relative to control) |          |                                   |                                                 |                                                                                                                                                     |
|---------------------------------------------|----------|-----------------------------------|-------------------------------------------------|-----------------------------------------------------------------------------------------------------------------------------------------------------|
|                                             | <25      | 25-50                             | 50-75                                           | 75-100                                                                                                                                              |
| <b>Compound Number</b>                      | C75, C97 | C29, C33, C50, C53, C87, C94, C95 | C9, C21, C25, C54, C56, C61, C62, C73, C78, C84 | C1-C8, C10-C20, C22-C24, C26, C27, C28, C30, C31, C32, C34-C49, C51, C52, C55, C57-C60, C62-C72, C74, C76, C77, C79-C83, C85, C86 C88-C93, C96, C98 |

**Table S3.** Percentage of inhibition reached by the positive compounds in the primary *in-vitro* screening. THP1 human macrophages were pretreated with 100  $\mu$ M of the hits from the virtual screening prior to addition of 400 ng/ml LPS (3 hours) and 4.5 mM ATP (45 min).

| <b>Compound number</b> | <b>% IL-1<math>\beta</math> (relative to control)</b> | <b>Standard Deviation</b> | <b>Statistical significance<sup>a</sup></b> |
|------------------------|-------------------------------------------------------|---------------------------|---------------------------------------------|
| C9                     | 71.5                                                  | 1.9                       | *                                           |
| C21                    | 66.2                                                  | 33.3                      | *                                           |
| C25                    | 56.4                                                  | 13.0                      | *                                           |
| C29                    | 42.3                                                  | 2.5                       | ***                                         |
| C33                    | 45.3                                                  | 5.1                       | **                                          |
| C50                    | 49.3                                                  | 12.8                      | *                                           |
| C53                    | 49.5                                                  | 3.5                       | *                                           |
| C54                    | 69.5                                                  | 17.2                      | *                                           |
| C56                    | 51.1                                                  | 7.0                       | ***                                         |
| C61                    | 57.2                                                  | 6.4                       | ***                                         |
| C62                    | 74.1                                                  | 9.2                       | *                                           |
| C73                    | 40.3                                                  | 20.4                      | *                                           |
| C75                    | 20.9                                                  | 9.3                       | **                                          |
| C78                    | 62.4                                                  | 5.8                       | *                                           |
| C84                    | 57.0                                                  | 6.8                       | *                                           |
| C87                    | 38.1                                                  | 7.9                       | ***                                         |
| C94                    | 50.1                                                  | 4.2                       | *                                           |
| C95                    | 47.3                                                  | 7.7                       | *                                           |
| C97                    | 21.3                                                  | 9.9                       | ***                                         |

<sup>a</sup> n=3, \* p $\leq$ 0.05, \*\*p $\leq$ 0.01, \*\*\* p $\leq$ 0.001.

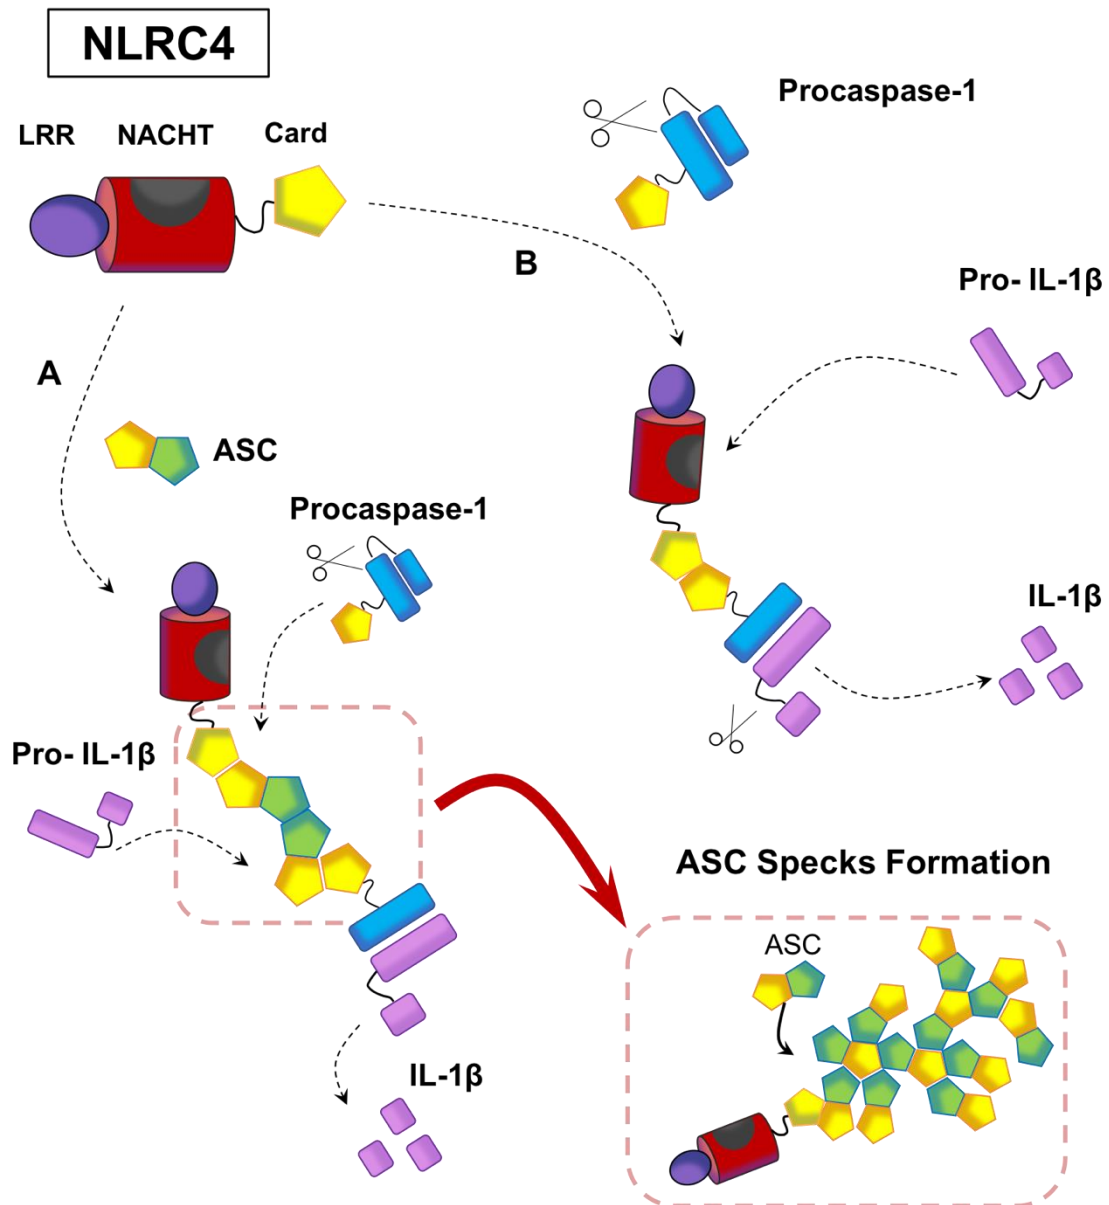

**Figure S1.** Activation of the NLRC4 inflammasome. The NLRC4 inflammasome is organized in three different domains; a leucine rich repeat domain (LRR), a nucleotide binding and oligomerization domain, and a card domain. Following activation, through its card domain, NLRC4 can directly interact with procaspase-1 (B), or can recruit the scaffolding protein ASC. ASC recruits procaspase-1, which induce its autoproteolytic activation and the subsequent binding and cleavage of IL-1 $\beta$ . Additionally, ASC homo-oligomerizes forming large specks, which propagates inflammation and present prionoid properties.

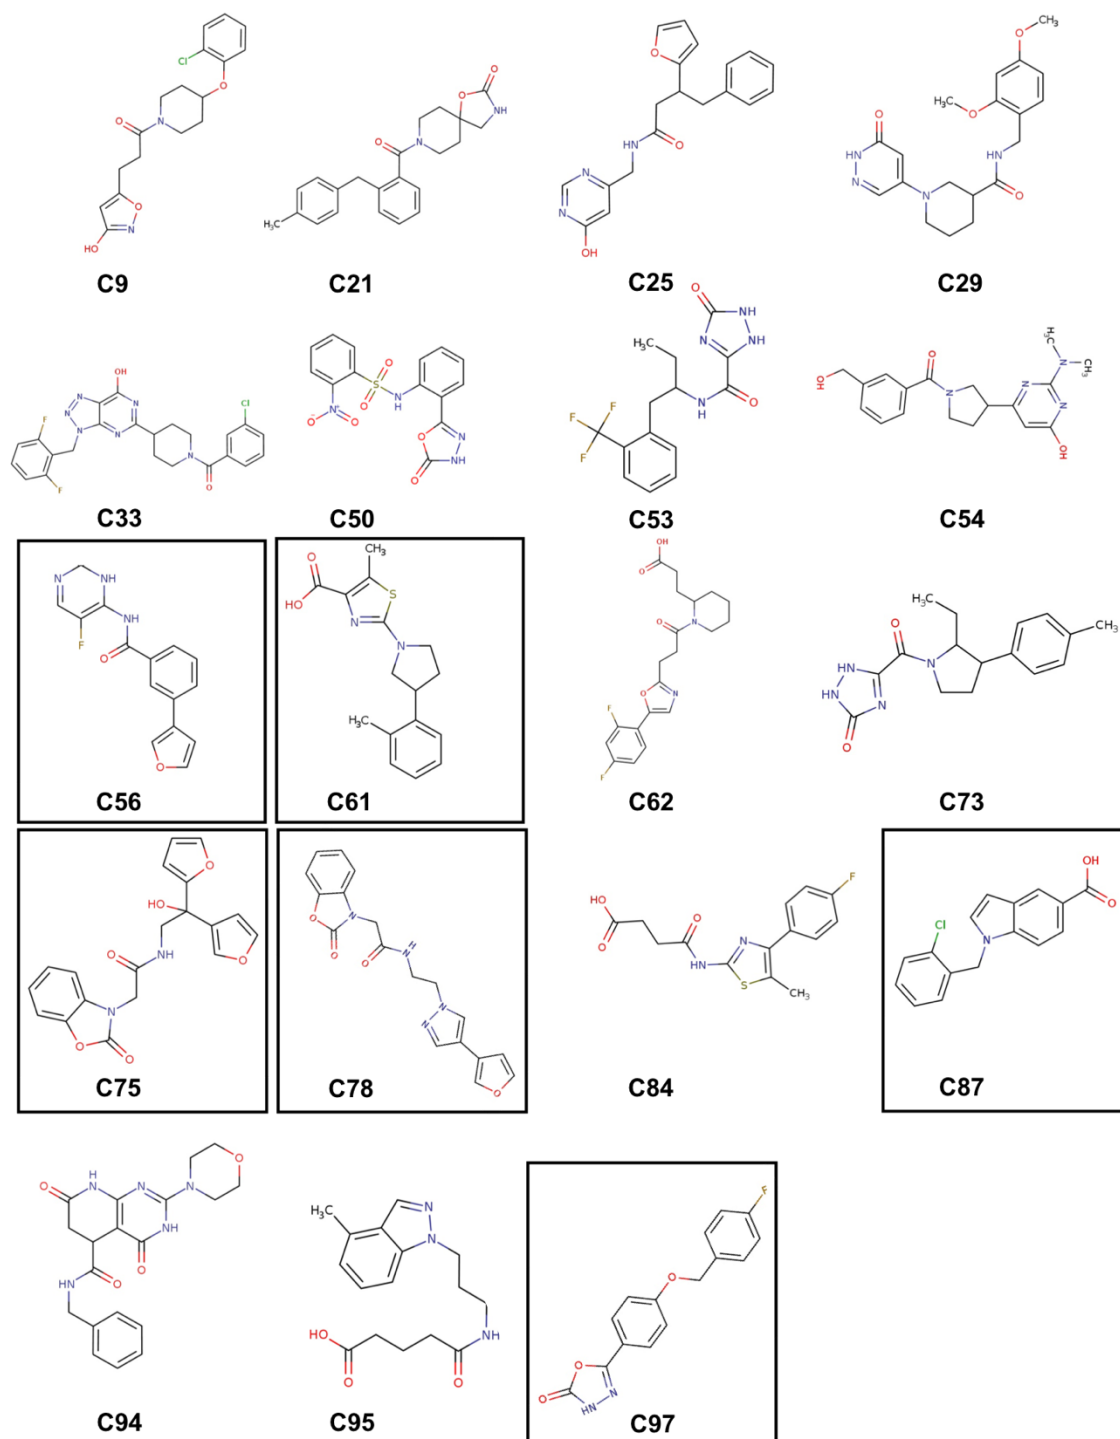

**Figure S2.** Chemical structure of the positive compounds from the primary screening.

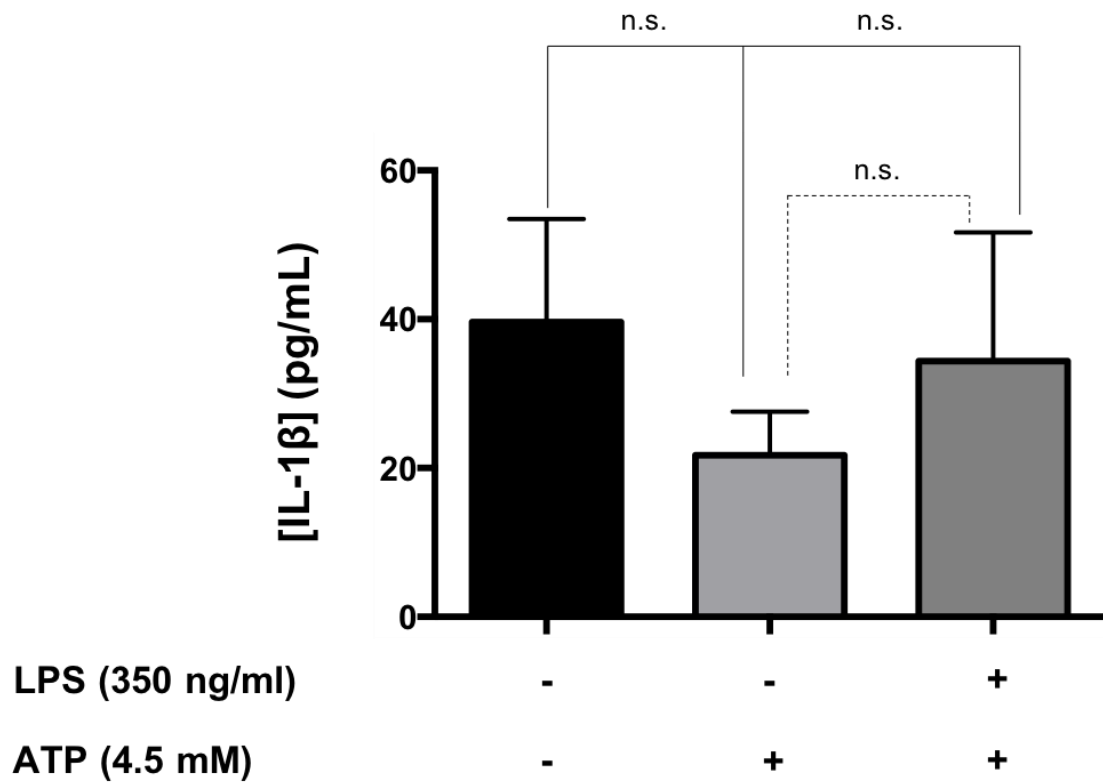

**Figure S3.** Treatment with LPS and ATP specifically activates NLRP3. Microglia cultures from NLRP3 KO mice was primed with 350 ng/ml LPS for 3 hours and subsequently activated with 4.5 mM ATP for 45 minutes. Data sets are compared with control samples (untreated cells).

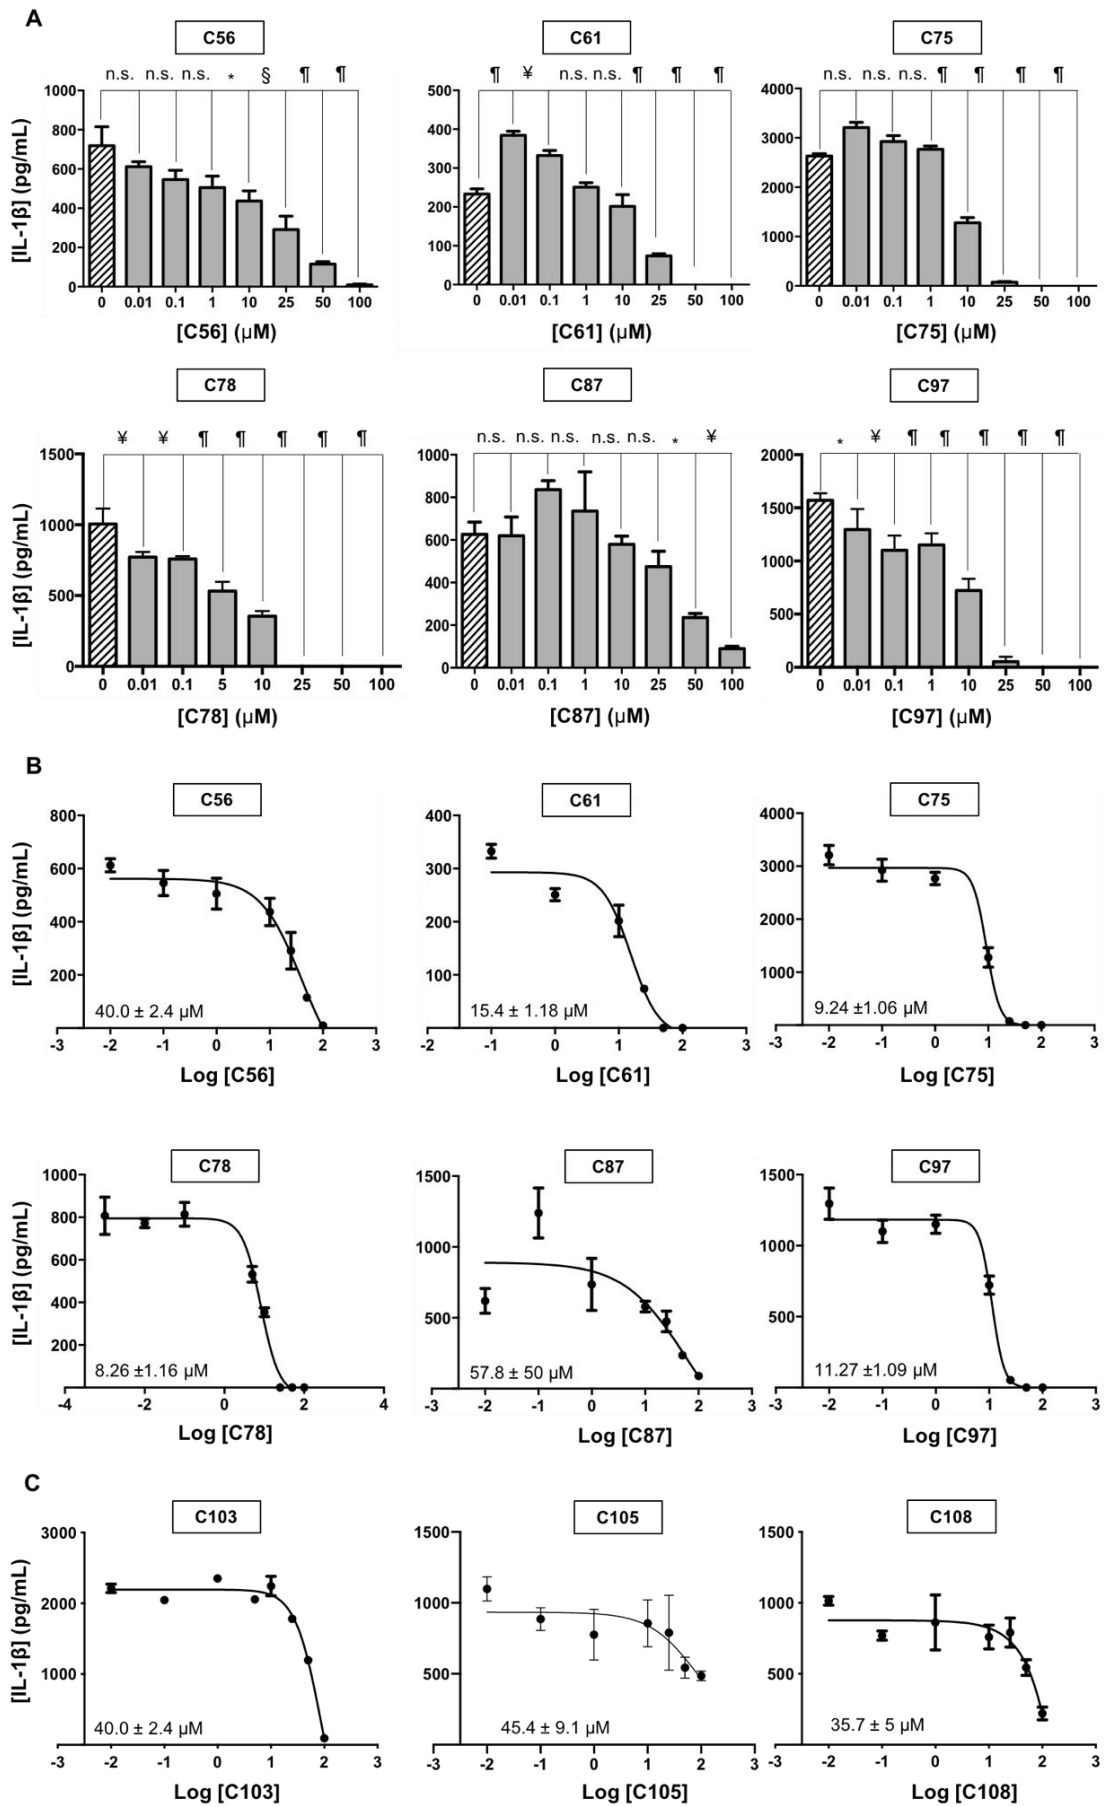



**Figure S4.** Dependency of the inhibitory effect with the concentration of the six compounds selected from the secondary *in-vitro* screening, as well as for the benzoxazolone acetamidyl derived compounds. Experiments were carried out in triplicate, and each sample was run in duplicate. Data sets are compared with controls (microglia cultures pretreated with the same DMSO %, and activated with LPS+ATP). Significance levels are indicated as \*  $p \leq 0.05$ ,  $\forall$   $p \leq 0.01$ ,  $\S$   $p \leq 0.001$ , ¶  $p \leq 0.0001$ .

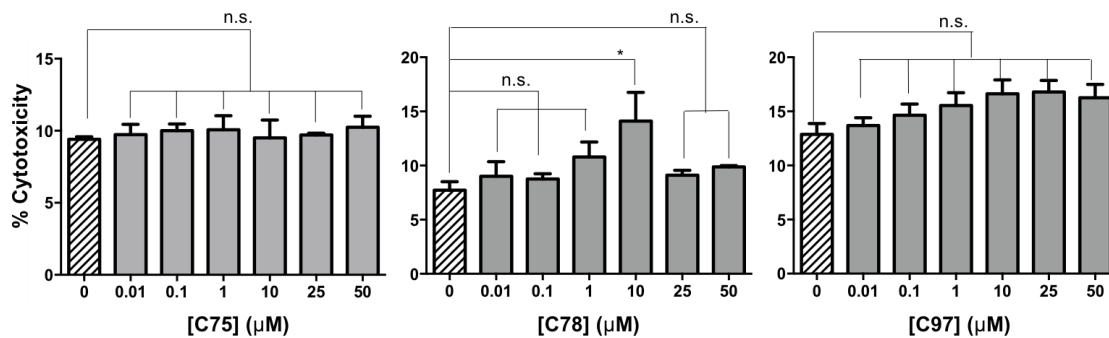

**Fig S5.** Cytotoxicity exerted by different concentrations of C75, C78 and C97. C78 presents a statistically significant increase in the cytotoxicity at 10  $\mu\text{M}$  when compared with vehicle-treated cells ( $p \leq 0.05$ ). However, since at higher concentrations, C78 is not toxic, and due to the significant standard deviation between replicates for this concentration, we consider this single point as an artifact.

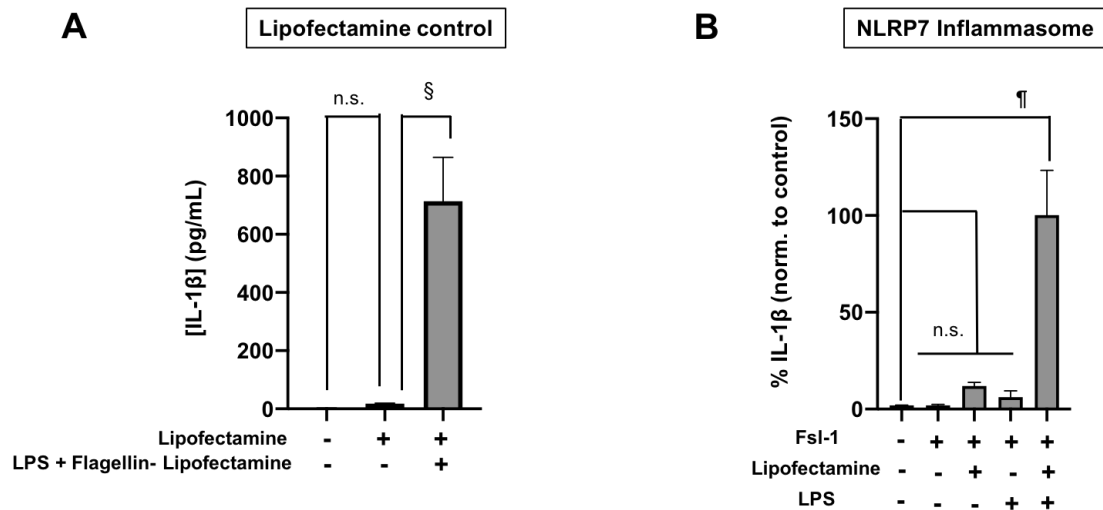

**Figure S6.** A) Effect of lipofectamine on microglia cultures. Primary microglia were treated with the same lipofectamine amount that used for flagellin transfection. Lipofectamine does not modify the IL-1 $\beta$  released to the extracellular medium. B) Conditions assayed for NLRP7 activation. Microglia cultures were kept untreated, as control, treated with 400 ng/ml fsl-1 for 7 hours; fsl-1 400 ng/ml transfected with lipofectamine, 150 ng/ml LPS for 1 hour prior to treatment with 400 ng/ml fsl-1, or 150 ng/ml LPS for 1 hour prior to 400 ng/ml transfection with lipofectamine. Experiments were carried out in biological triplicates, and samples were run in duplicate. Data sets are compared with control. Significance levels are indicated as \*  $p \leq 0.05$ , †  $p \leq 0.01$ , §  $p \leq 0.001$ , ¶  $p \leq 0.0001$ .

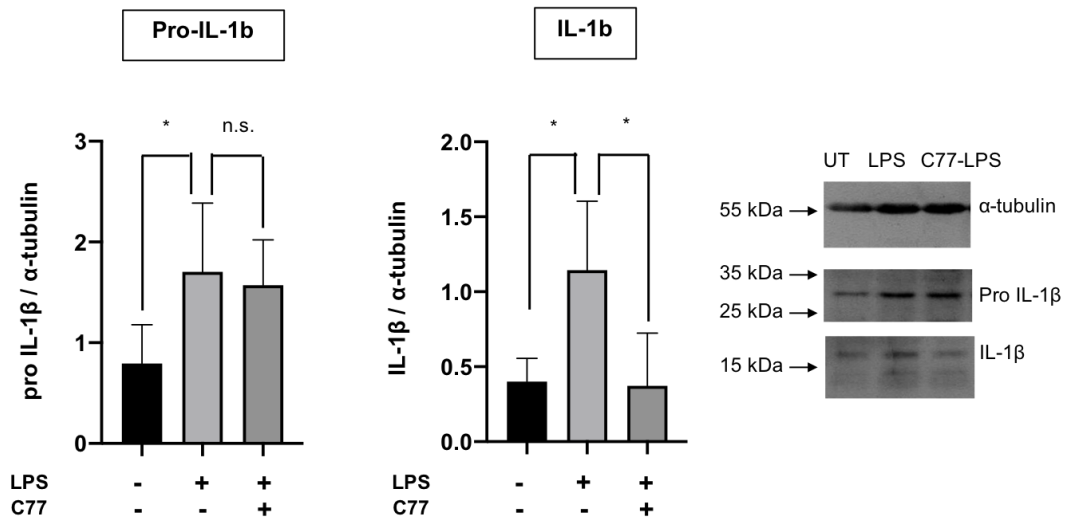

**Figure S7.** Western-blot quantification of pro IL-1 $\beta$  and IL-1 $\beta$  in the FC of mice treated with DMSO/PBS as vehicle, DMSO/LPS (15 mg/kg), or C77 (50 mg/kg)/LPS 15 mg/kg. n=4 animals. Significance levels are indicated as \* p $\leq$ 0.05, ‡ p $\leq$ 0.01, § p $\leq$ 0.001, ¶ p $\leq$ 0.0001.

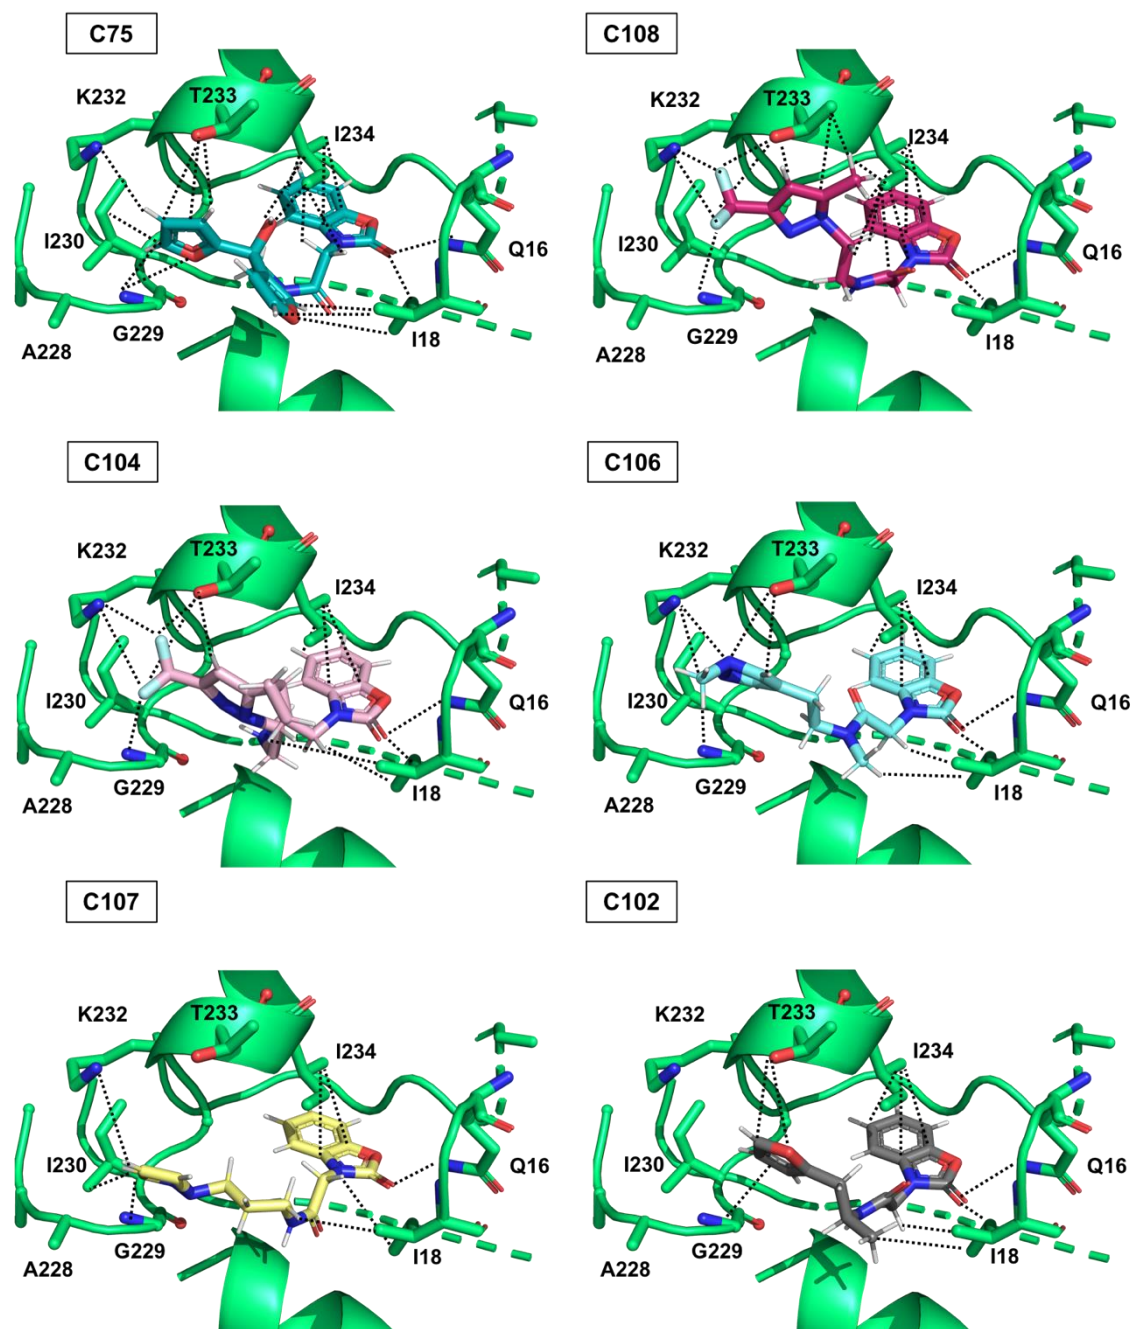

**Fig S6.** Structural models for the interaction of the analogs within the ATP binding pocket. The compounds are ordered according to their in-vitro ability to inhibit NLRP3-mediated IL-1 $\beta$  secretion, starting from C75. Thus, C75>C108> C104>C106>C107~C102. The models were obtained through computational docking, (<http://www.swissdock.ch/>) and represented using pymol (<https://pymol.org/2>). Residues stabilizing the inhibitors are shown in sticks and colored in CPK code. Interactions between side chains of these residues and the compounds are displayed in dotted lines.

## Supplementary methods

### *Calculation of IC50 values*

The IC50 value for an inhibitory process is defined as the concentration of an inhibitor required to half-reduced the measured parameter. In this manuscript, it refers to the concentration of a specific compound to reduce by the 50% the IL-1 $\beta$  concentration in cell supernatant (for inflammasome inhibition), or the ATP transformed into ADP (in the case of the ATPase activity). IC50 values were calculated through non-linear regression of the values obtained in dose-response curves to a “log [Cx] vs response” model implemented in GraphPad 8, according to Eq. S1.

**Eq. S1** 
$$Y = \text{Bottom} + (\text{Top} - \text{Bottom}) / (1 + 10^{(X - \text{LogIC50})})$$

Where Y represents the measured magnitude, Top is the highest value for the measured magnitude, Bottom is the lowest value for the measured magnitude.
